# Supplementary material
Source: PubMed Central journal article supplement (PMC5903426)

Fig. 1.

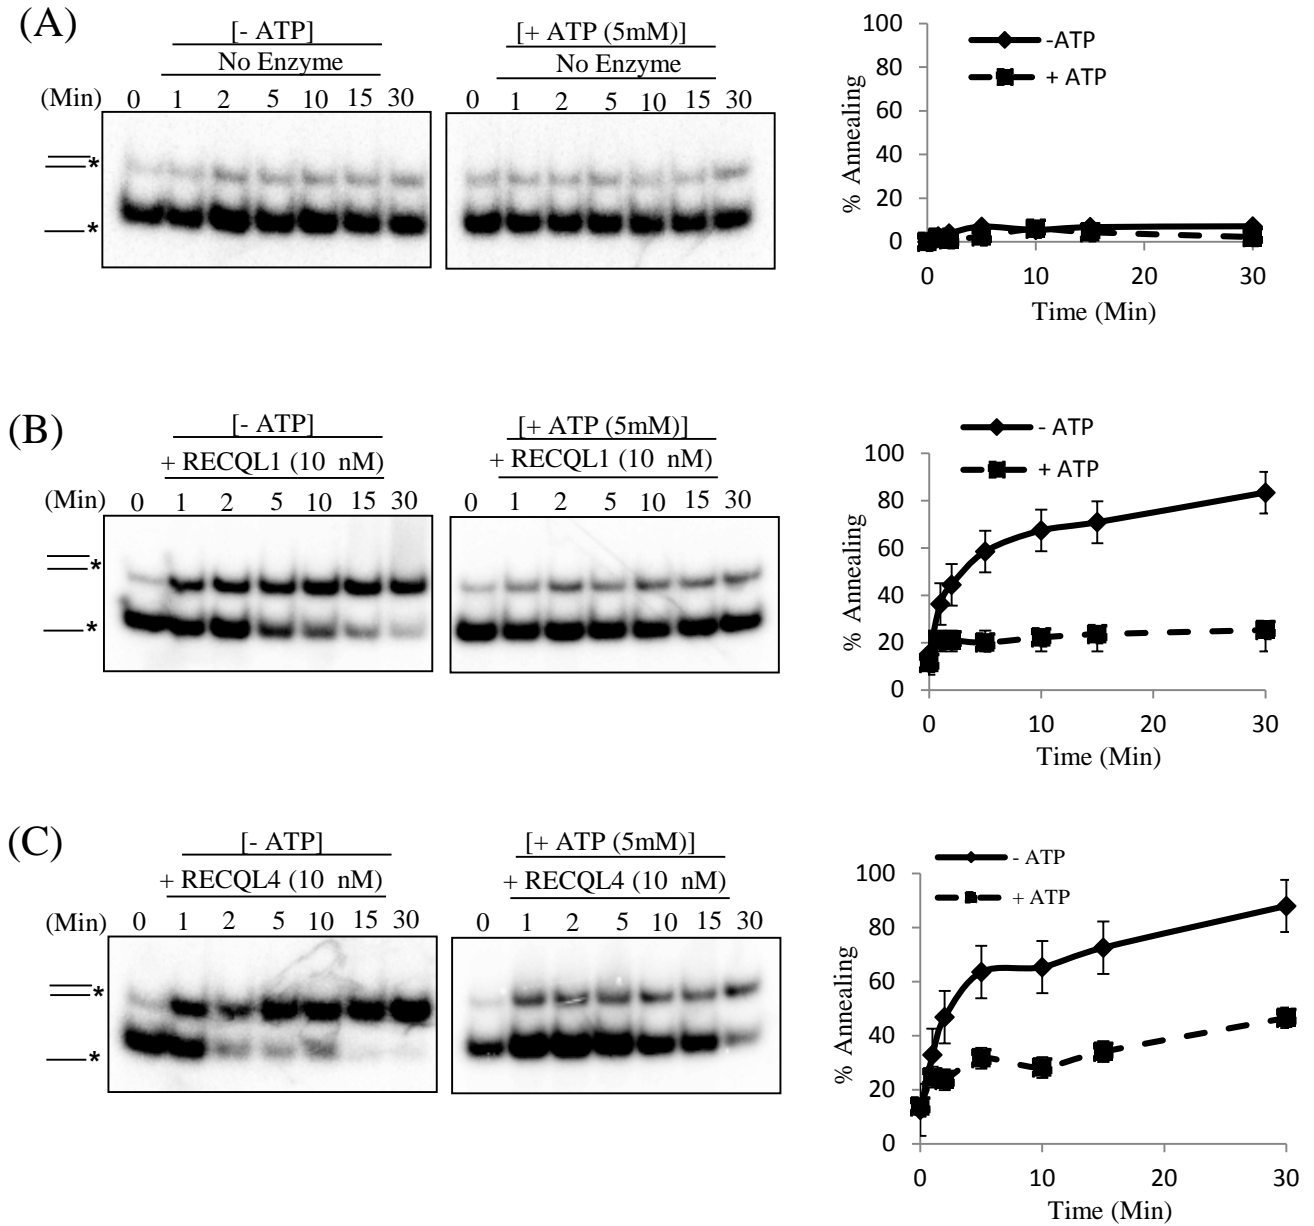

Fig. 1. continued

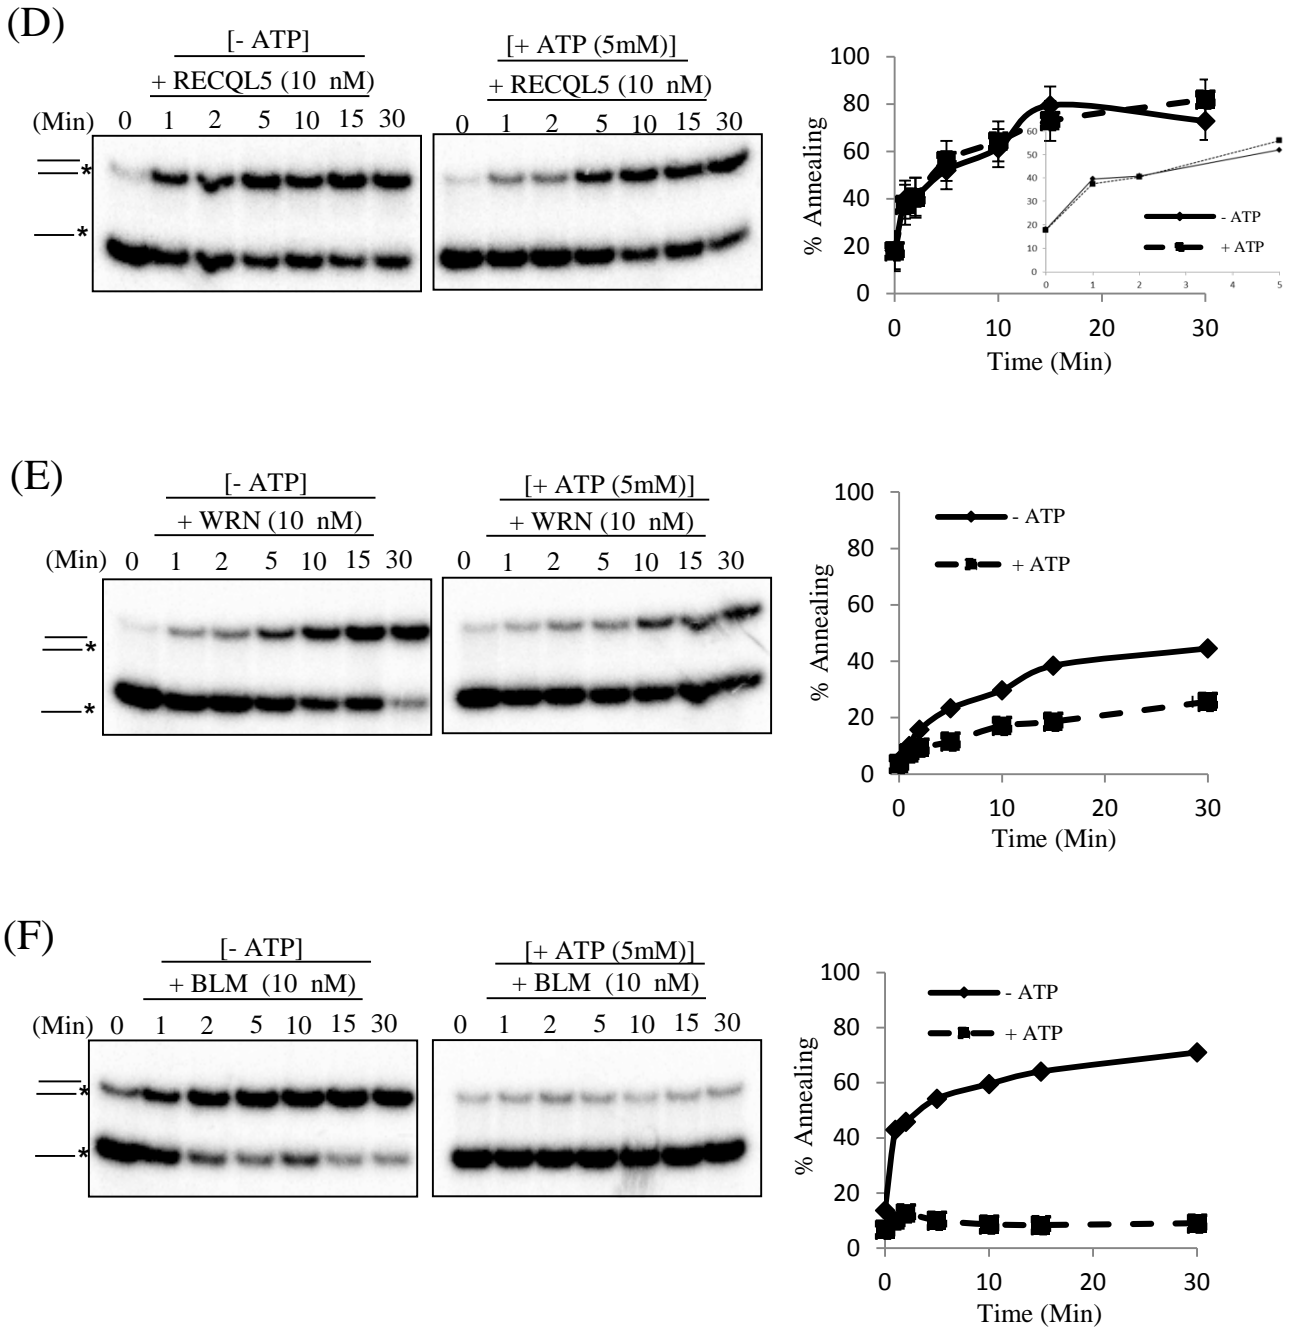

Fig. 2.

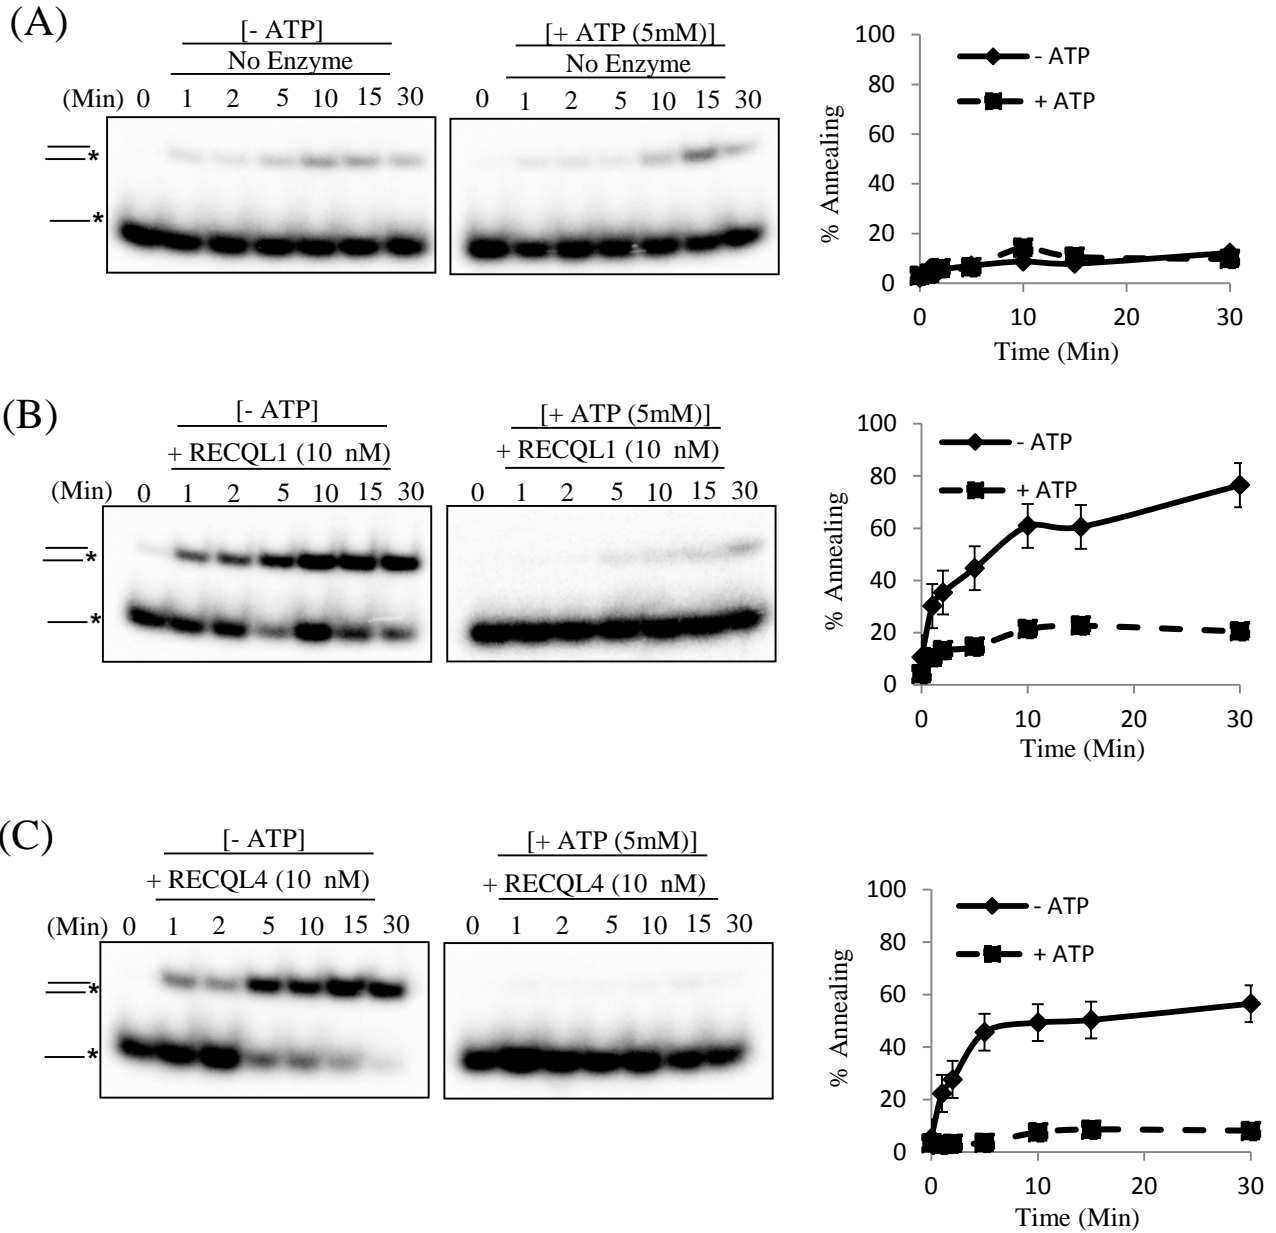

Fig. 2. continued

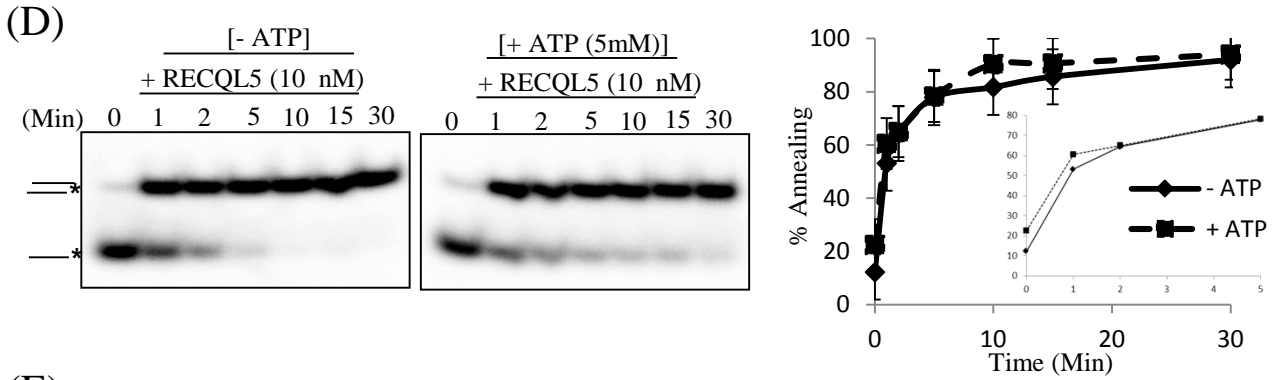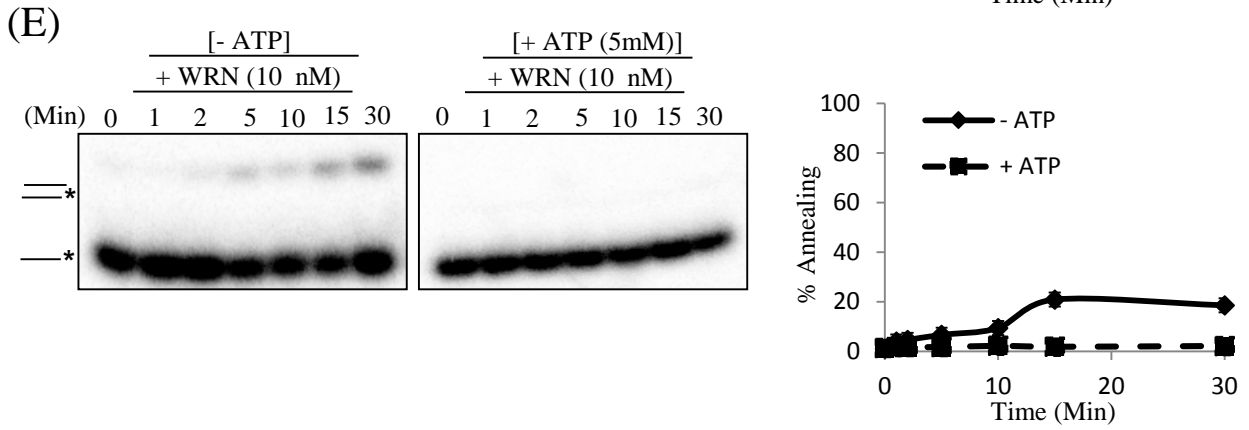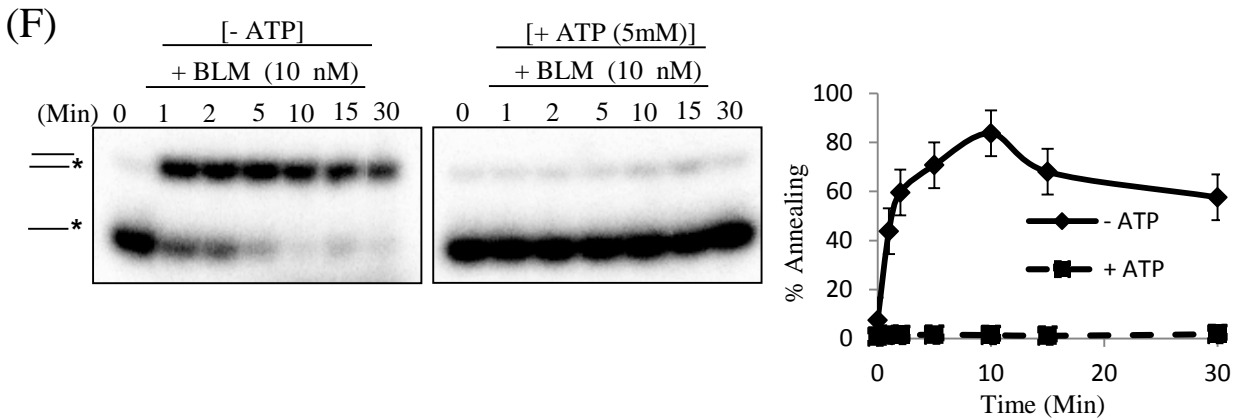

Fig. 3

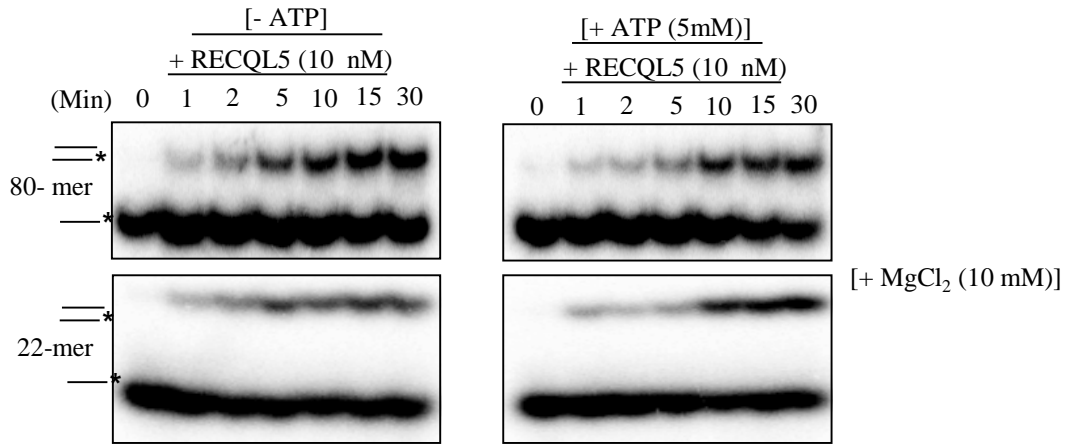

Fig. 4.

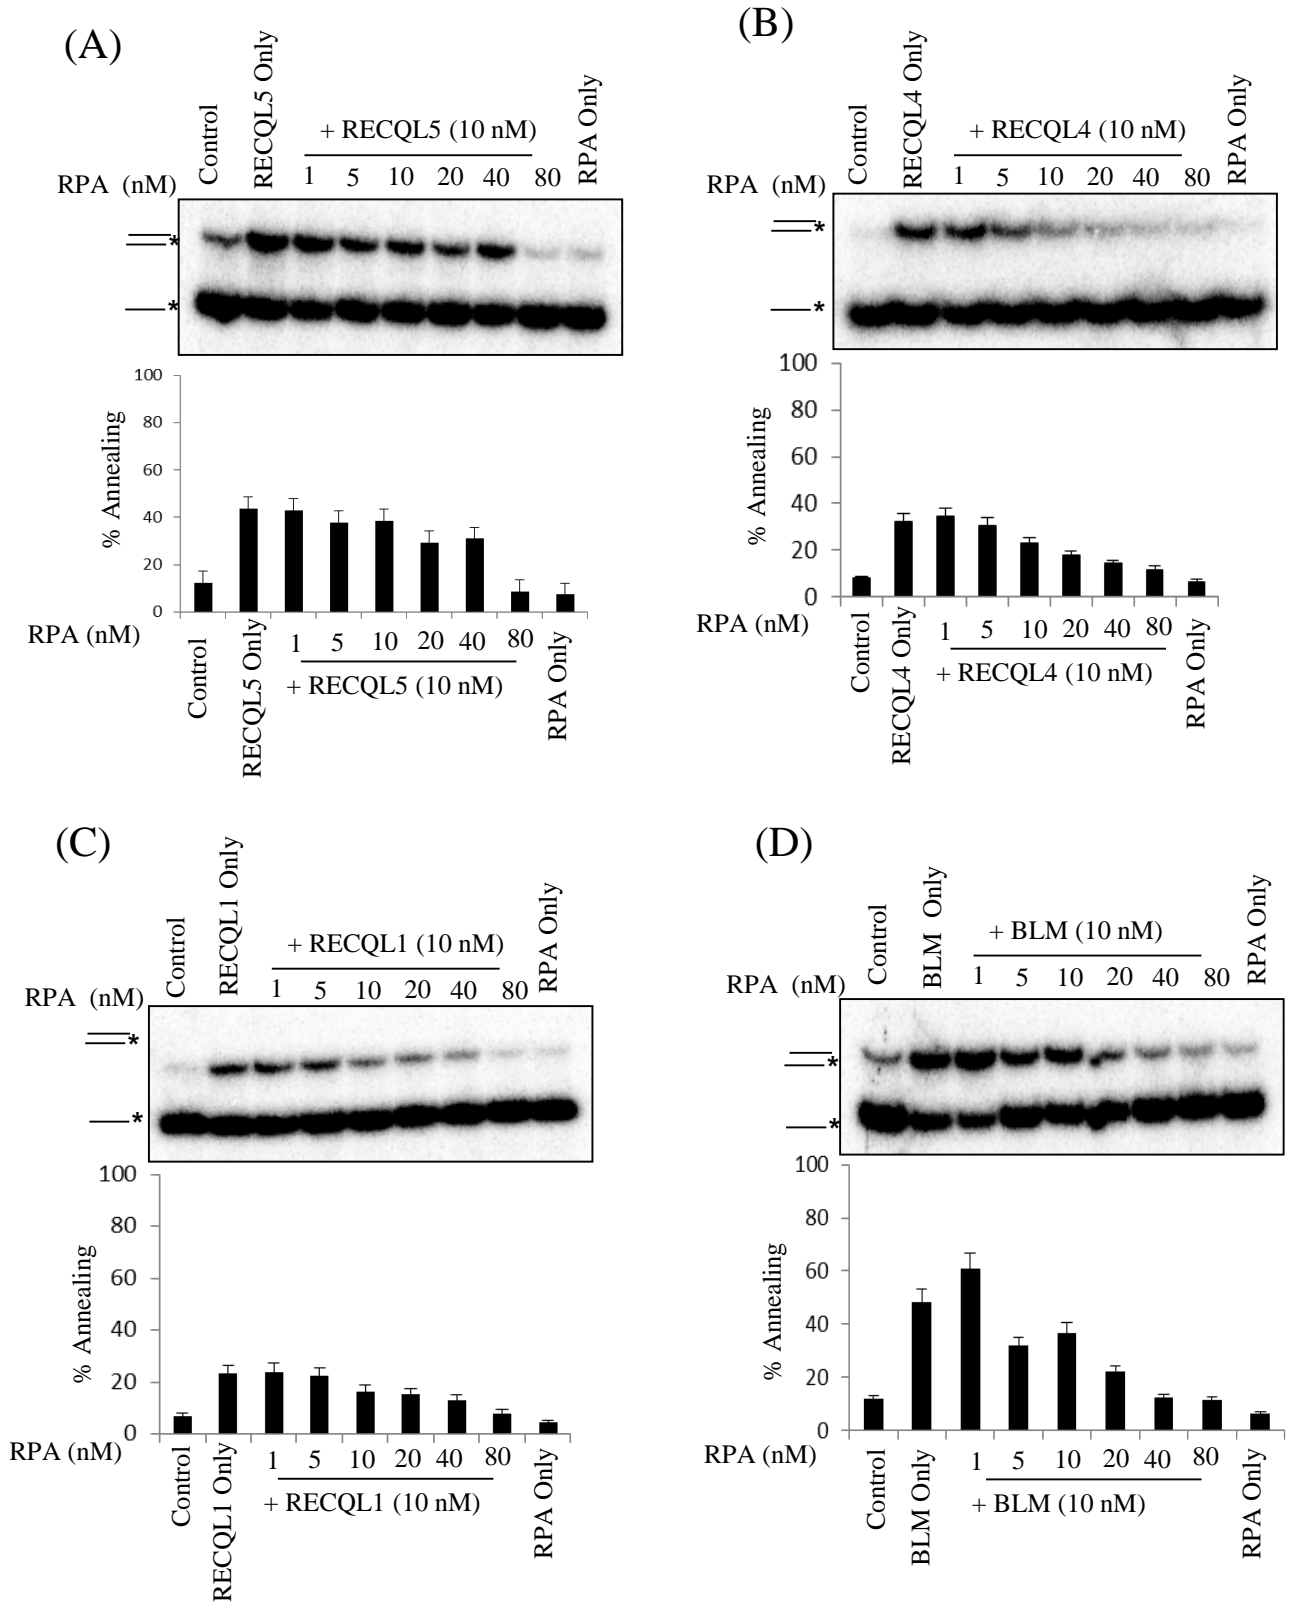

Fig. 4. continued

(E)

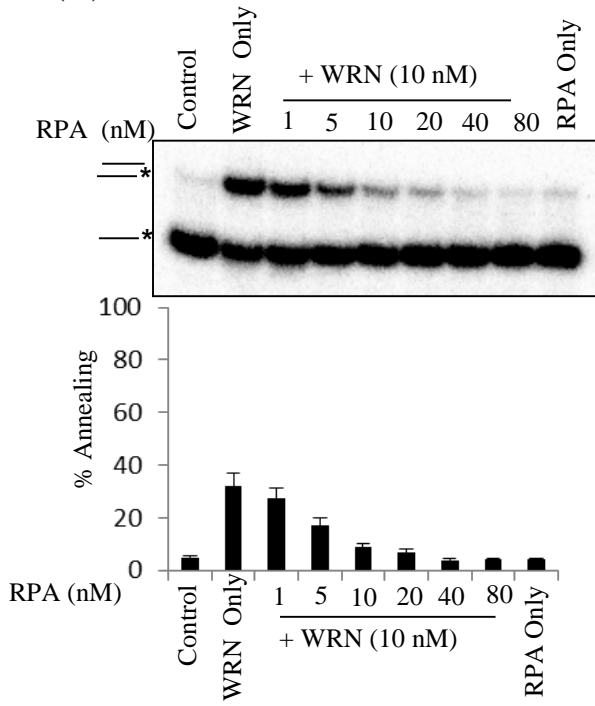

Fig. 5.

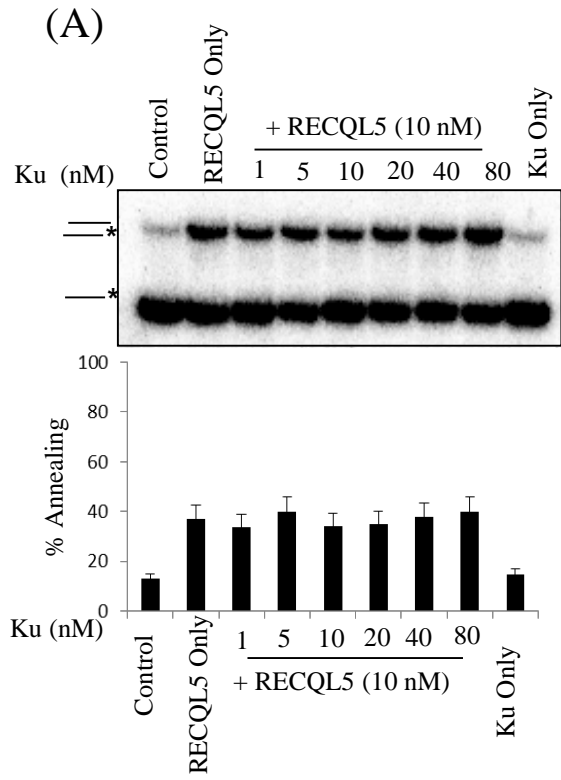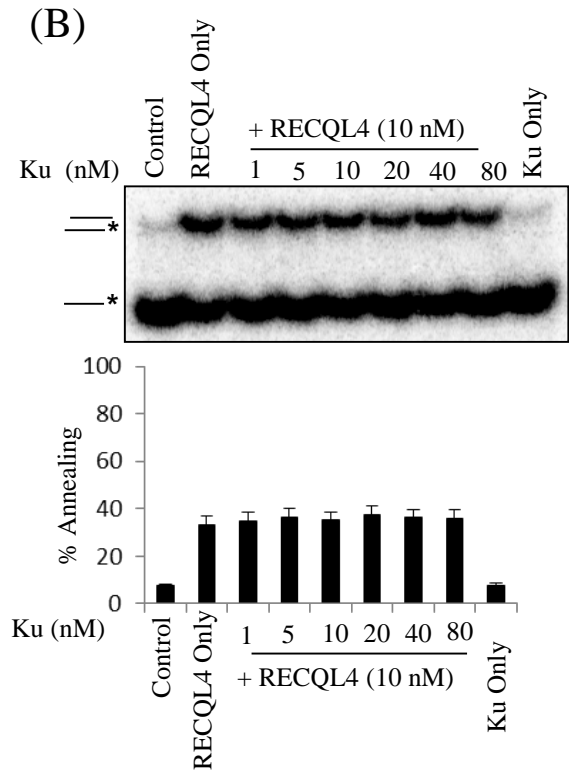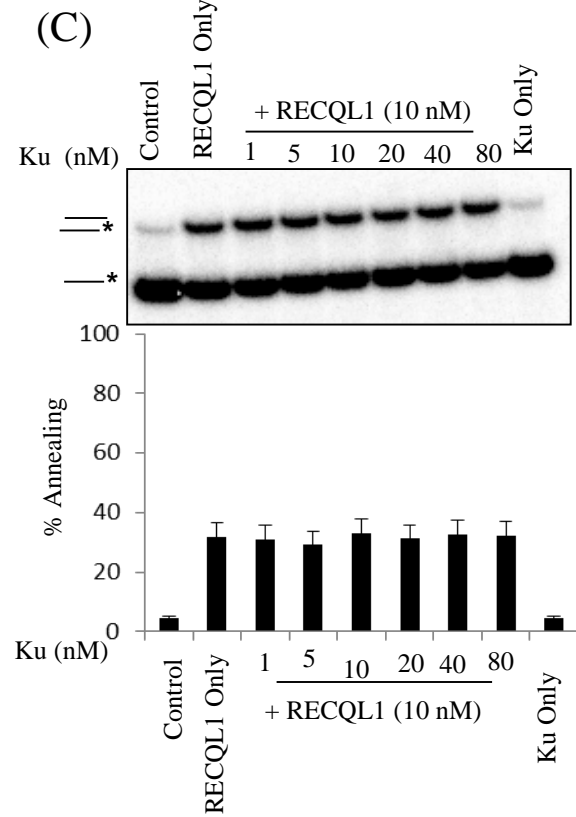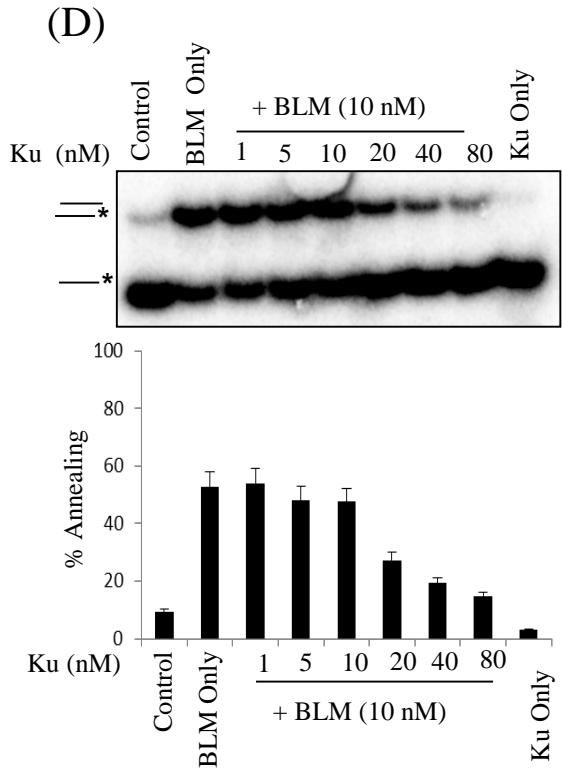



Fig. 5. continued

(E)

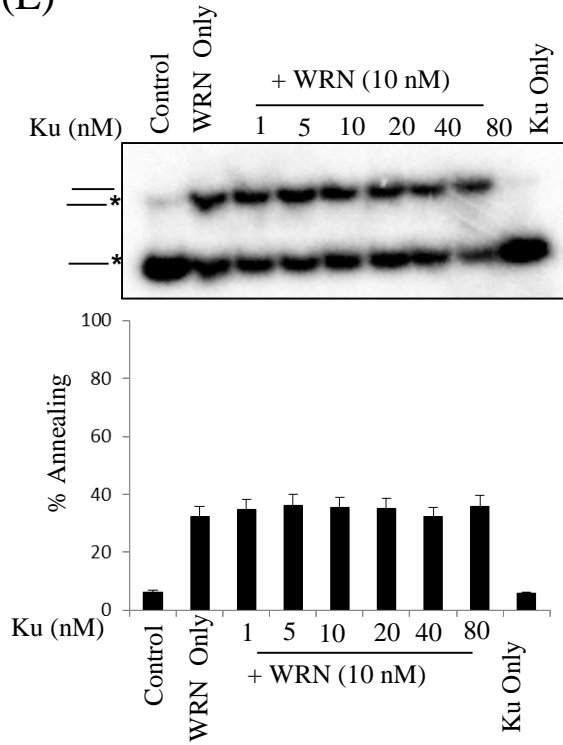

Fig. 6.

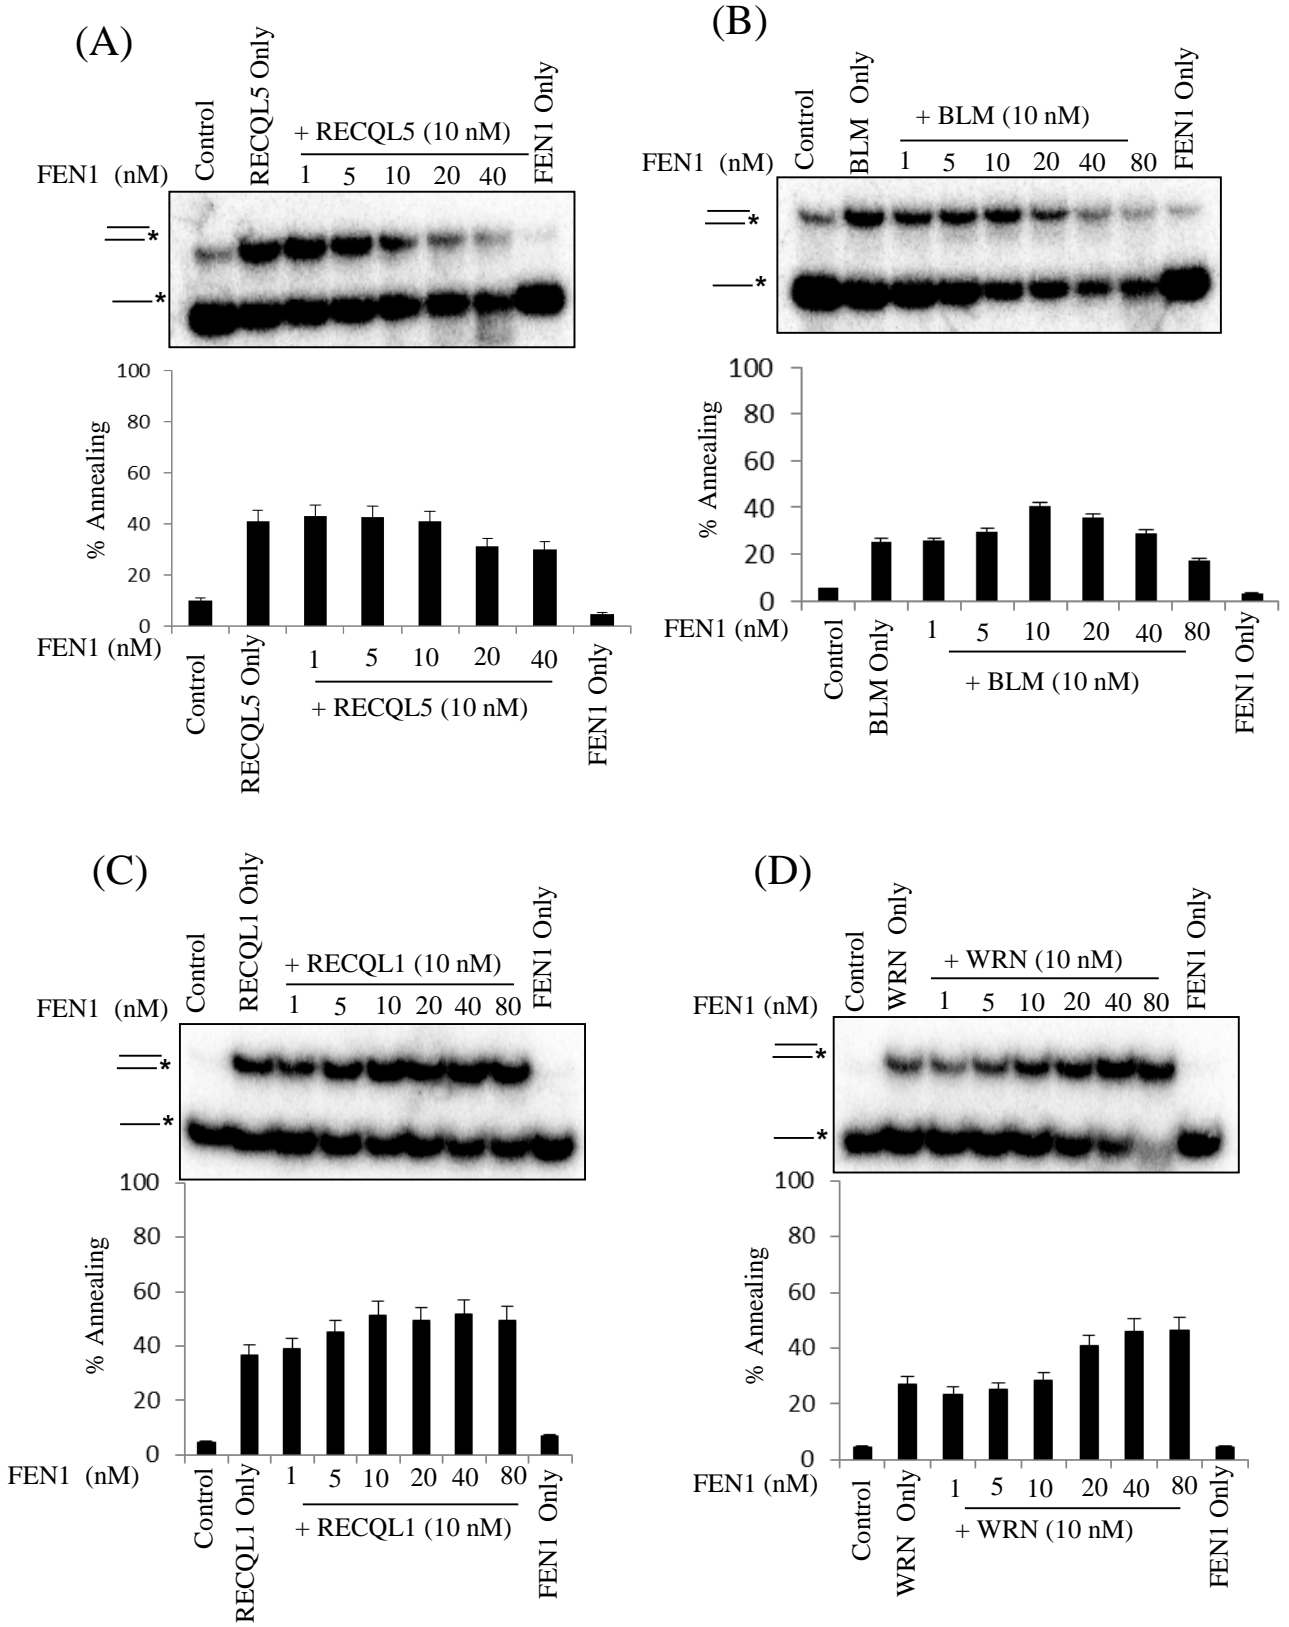

Fig. 7.

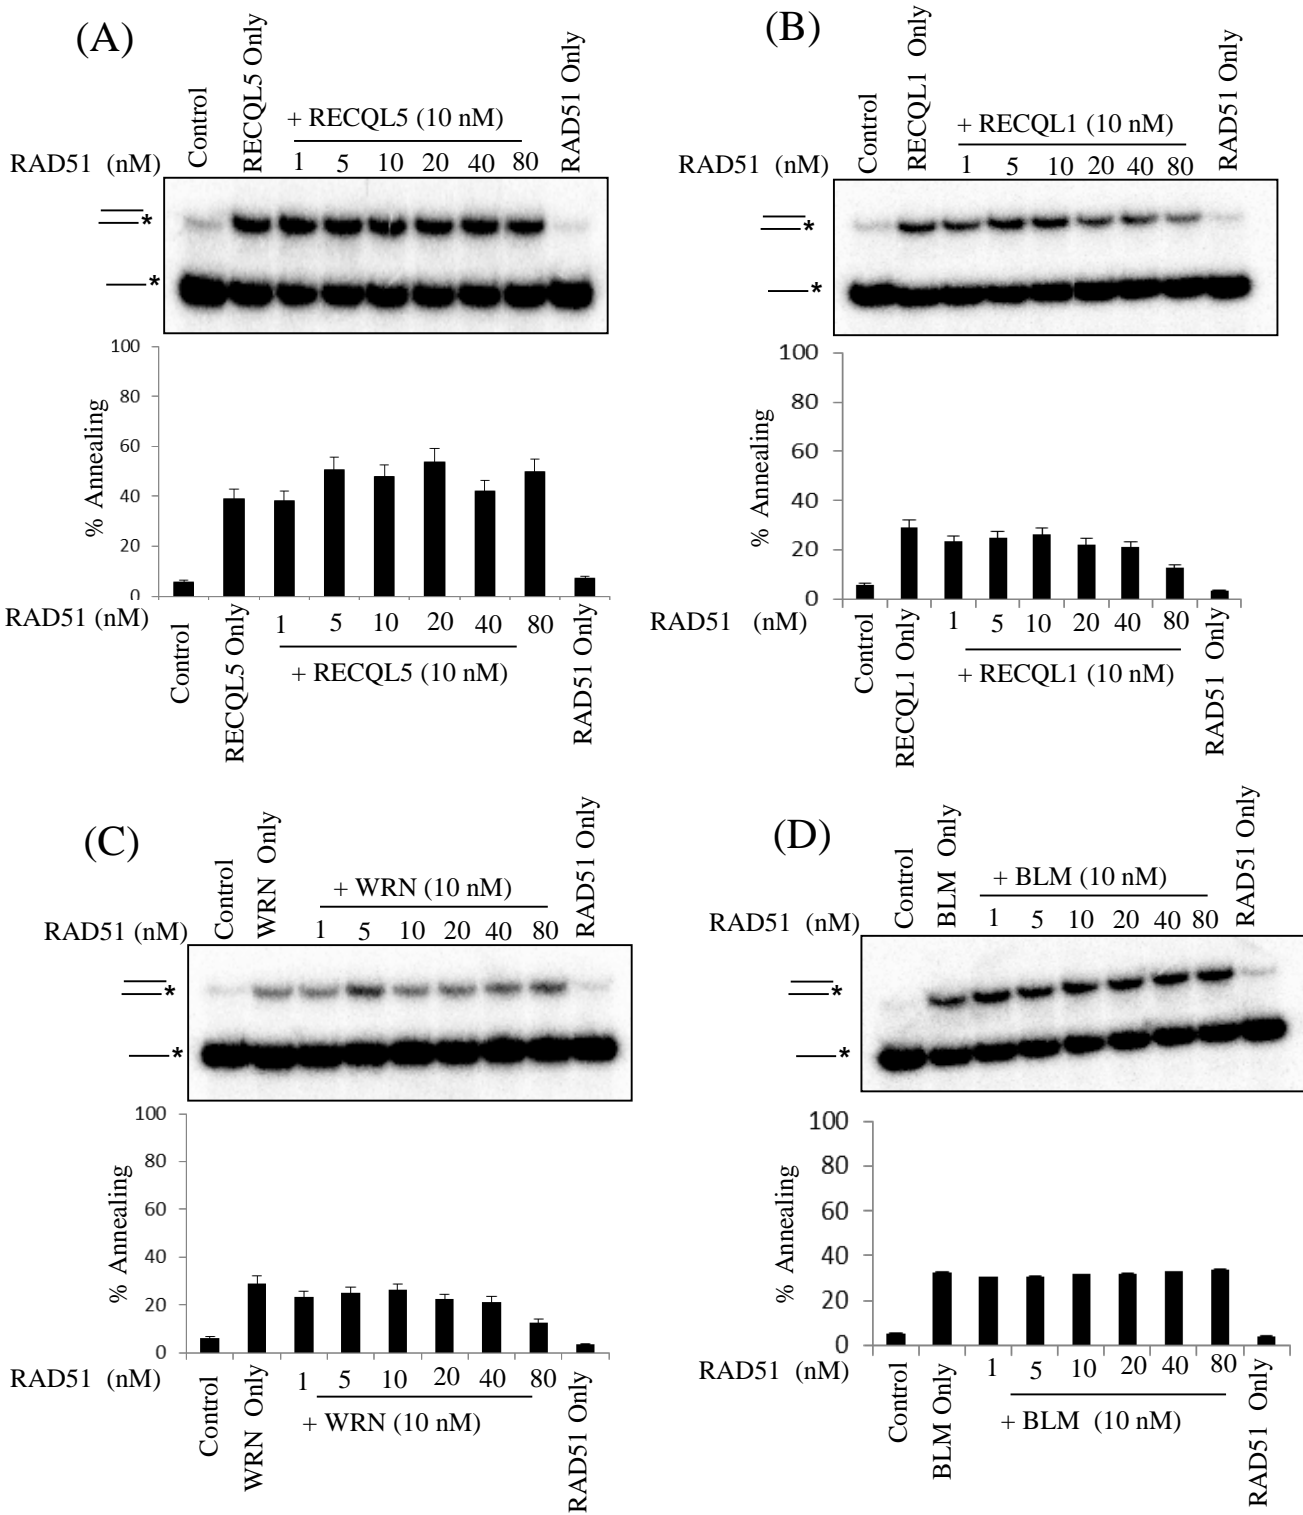

Fig. 8.

(A)

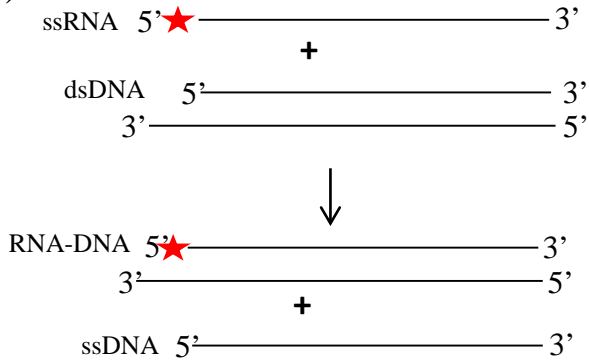

(B)

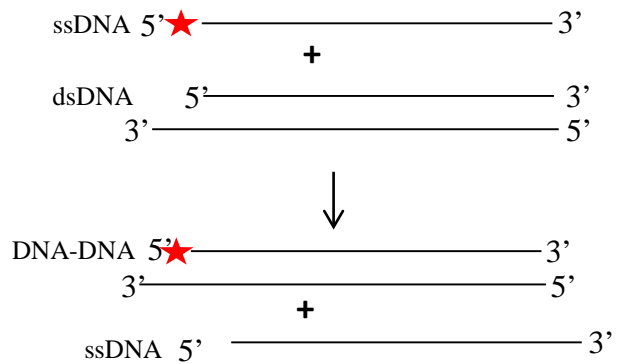

RNA-DNA annealing

(C)

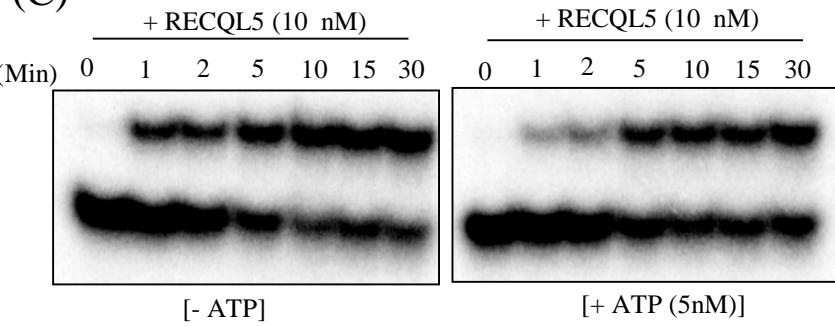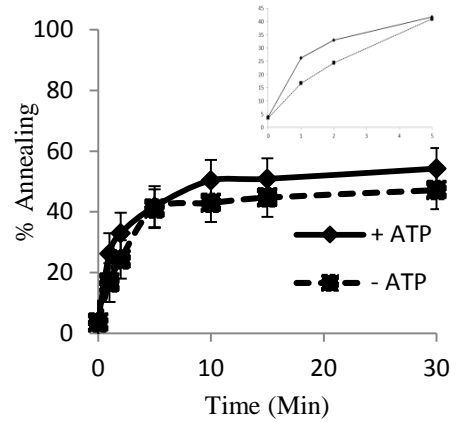

DNA-DNA annealing

(D)

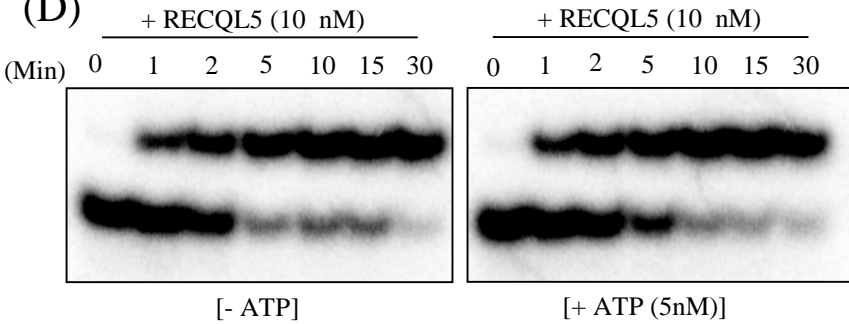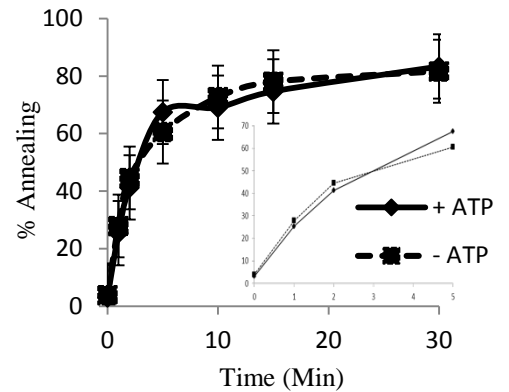

Fig. 8. continued

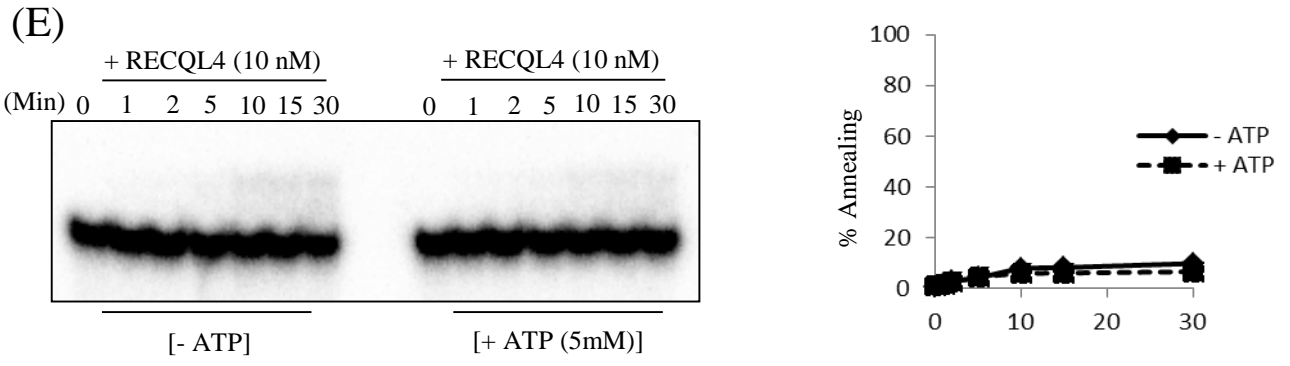

# Supplementary Fig. S1.

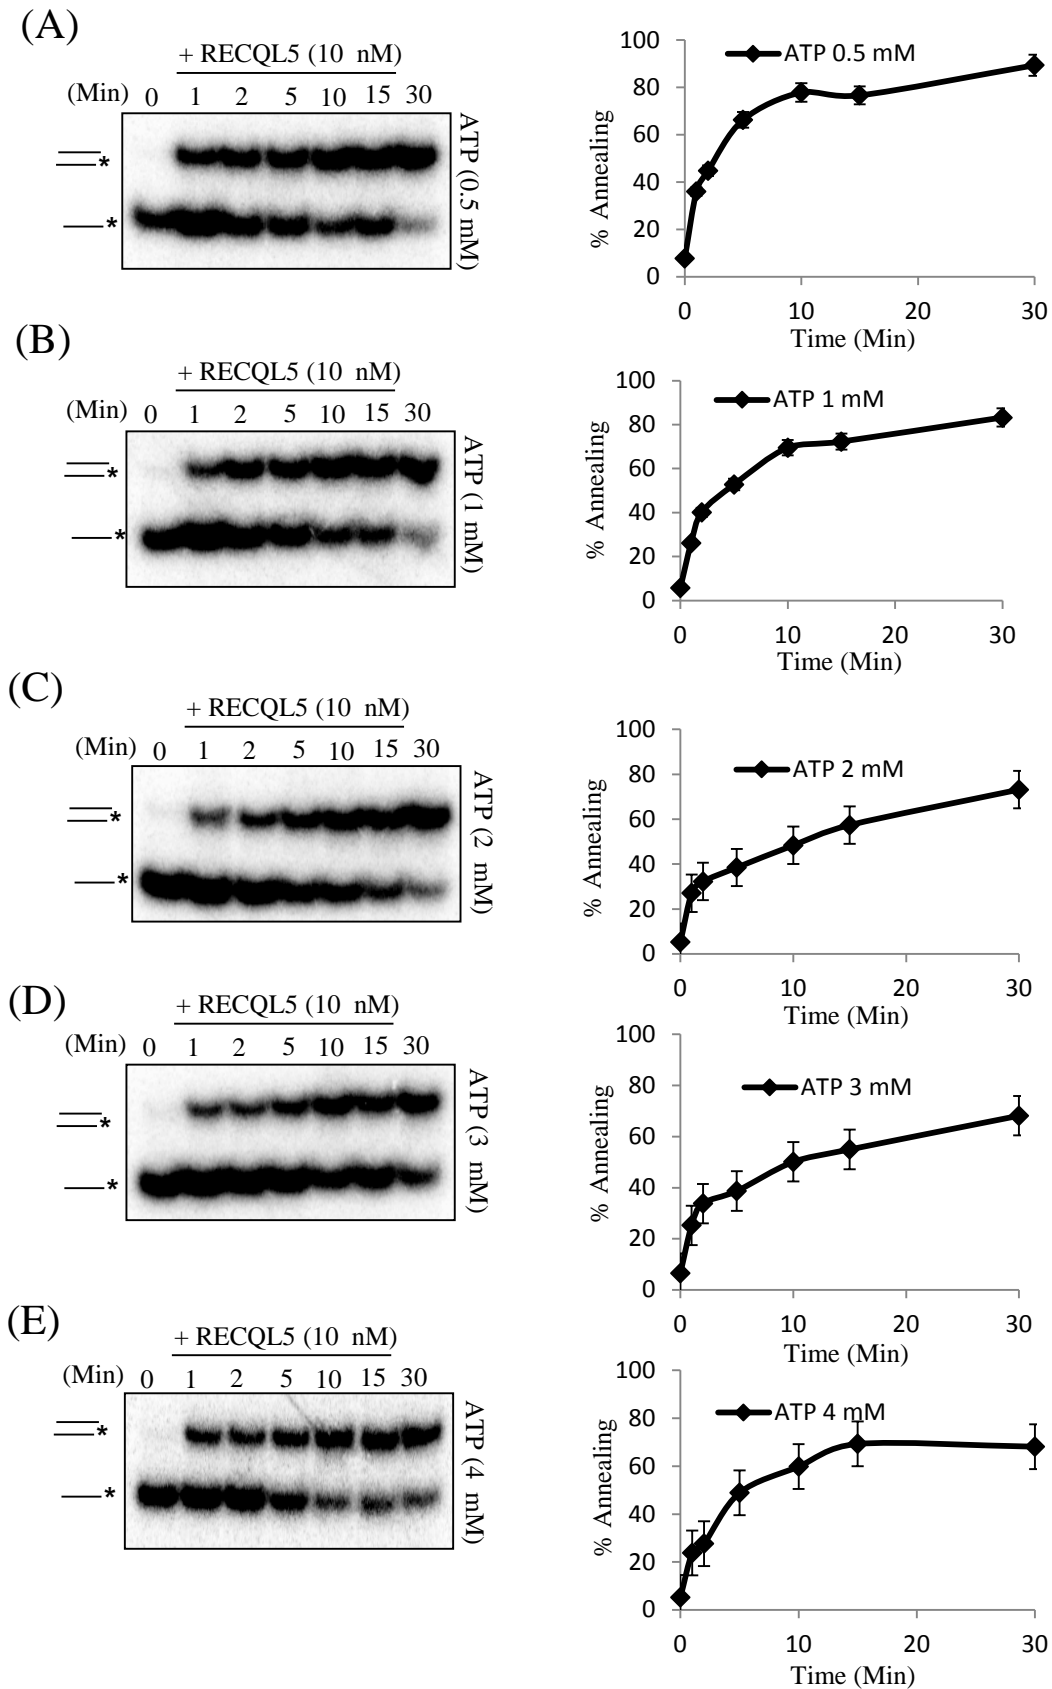

# Supplementary Fig. S2.

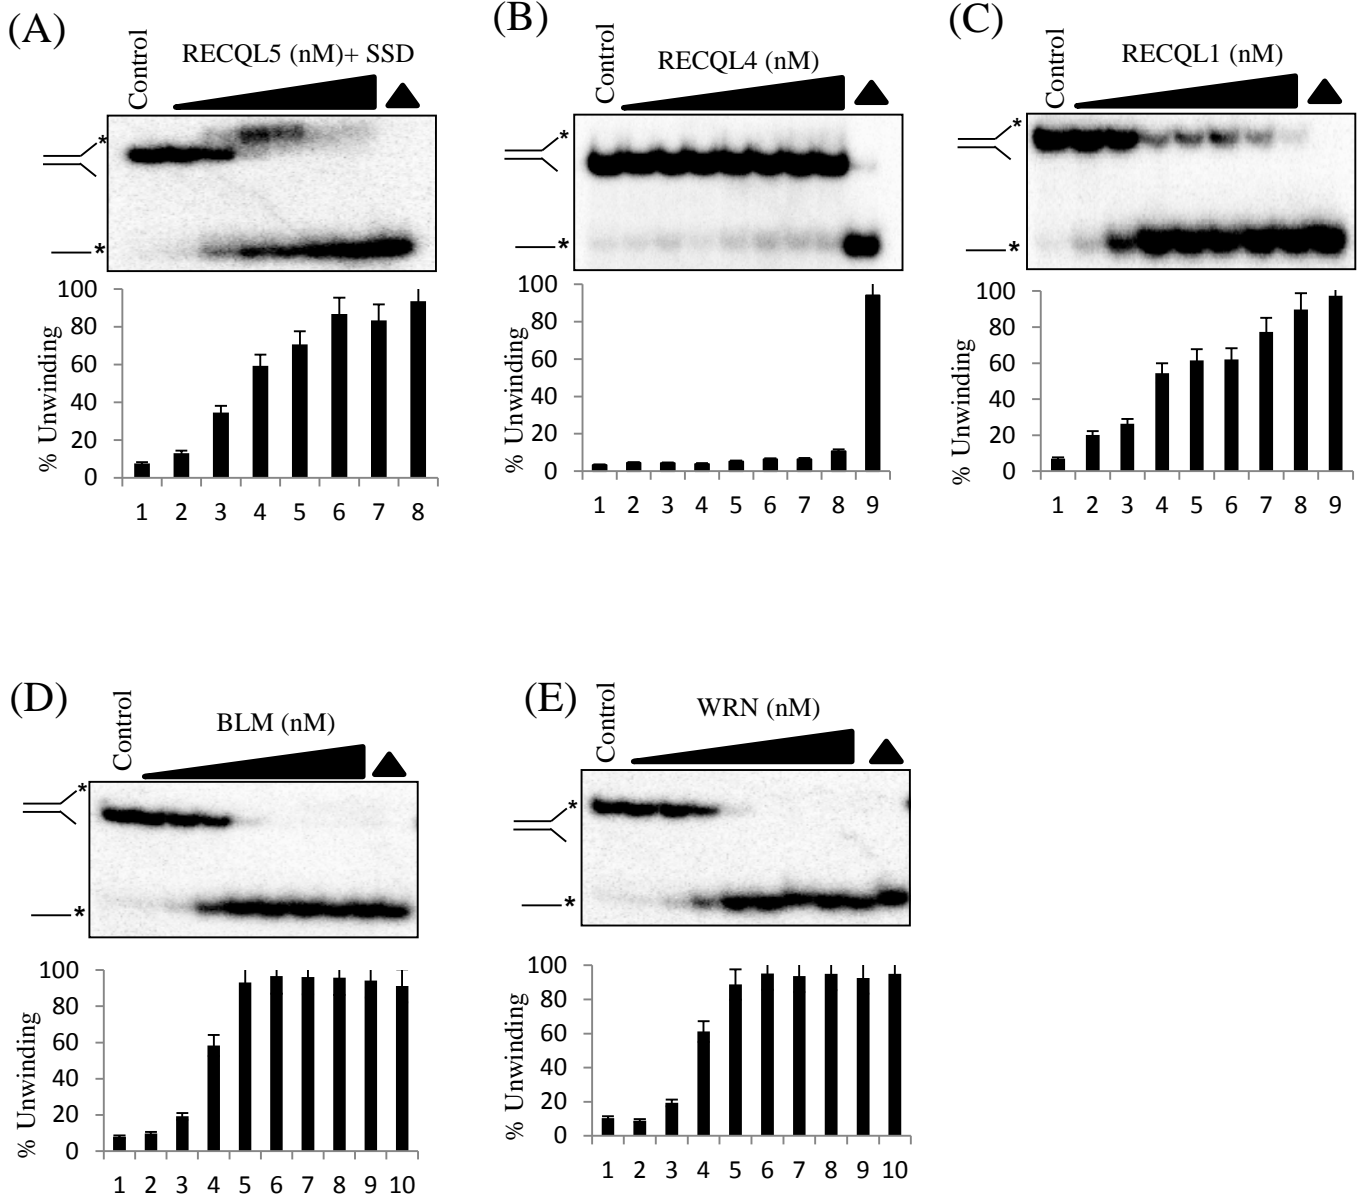

# Supplementary Fig. S3.

(A)

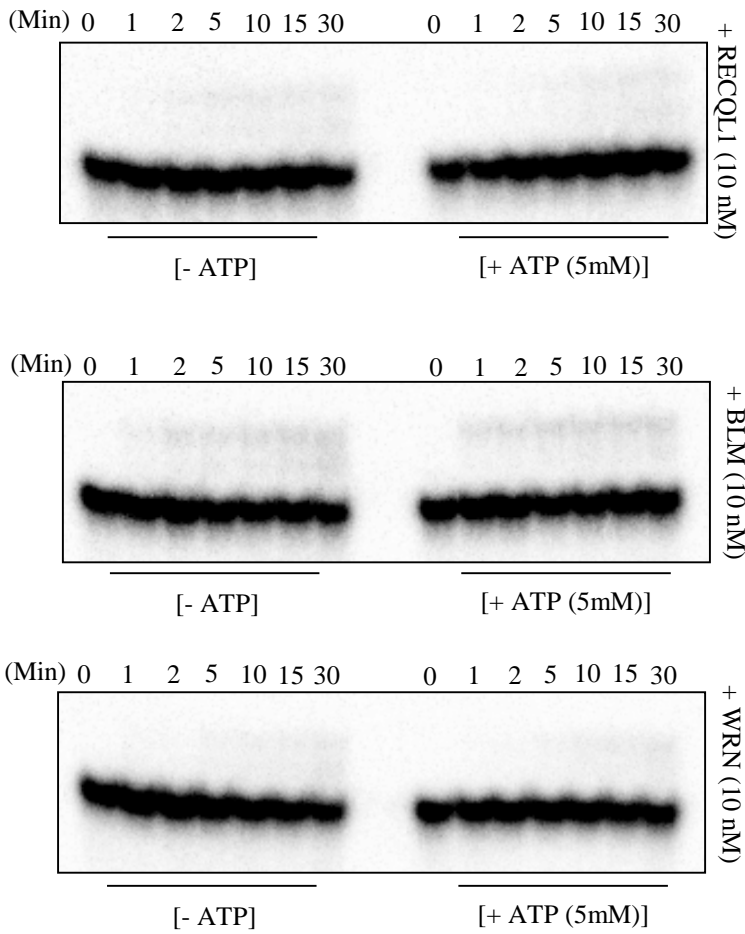

(B)

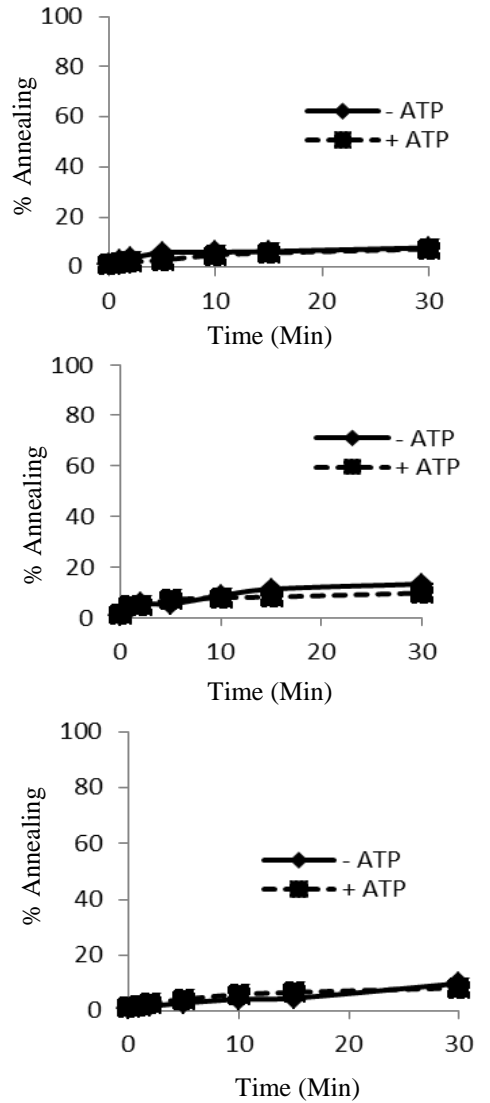



# Supplementary Fig. S4.

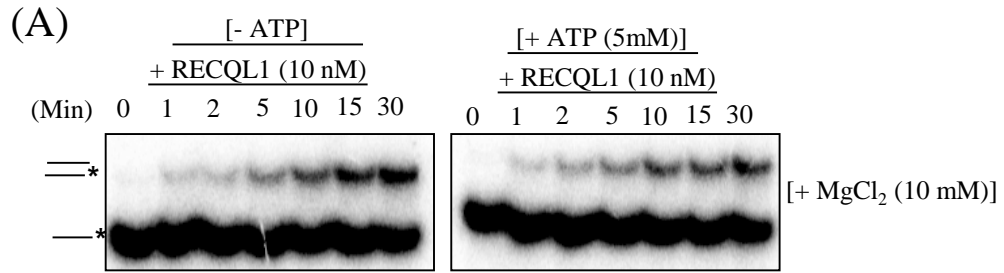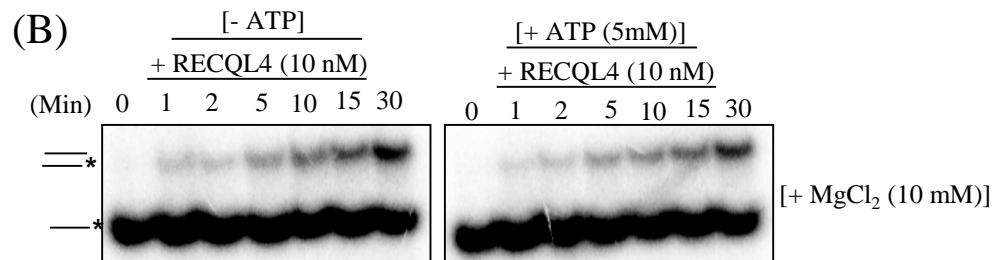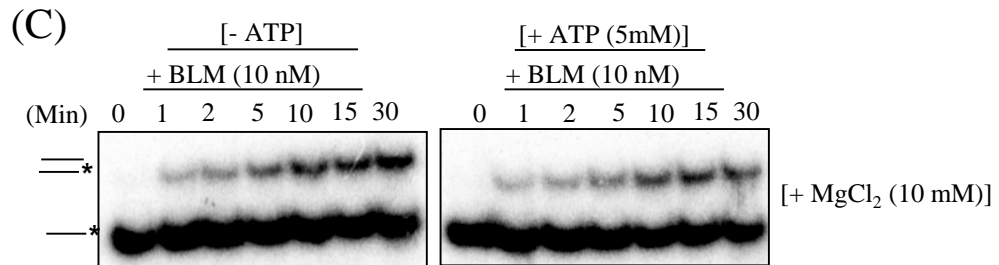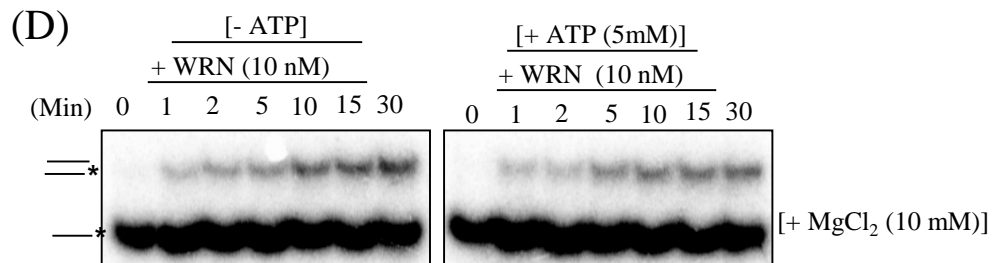

Supplement: NIHMS742062-supplement-S1.pdf [file NIHMS742062-supplement-S1.pdf]
